# Supplementary material for: Persistent Fever and Positive PCR 90 Days Post-SARS-CoV-2 Infection in a Rituximab-Treated Patient: A Case of Late Antiviral Treatment
Source: MDPI journal article supplement (doi:10.3390/v14081757), 2022-08-11
Supplement: s1 [file s1]

**Supplementary Table S1:** Supplementary laboratory analyses performed to exclude other fever-causing conditions

| Material               | Analysis                                 | Result            |
|------------------------|------------------------------------------|-------------------|
| Blood                  | Cultivation                              | Negative          |
|                        | <u>Infectious diseases serology:</u>     |                   |
|                        | <i>Brucella</i> (IgM, IgG, IgA)          | Negative          |
|                        | <i>Coxiella</i> (IgM, IgG)               | Negative          |
|                        | Epstein-Barr virus EBNA IgG              | Positive*         |
|                        | Epstein-Barr virus DNA                   | Negative          |
|                        | <i>Borrelia burgdorferi</i> (IgM, IgG)   | Negative          |
|                        | <i>Toxoplasma gondii</i> (IgM, IgG)      | Negative          |
|                        | <i>Francisella tularensis</i> antibodies | Negative          |
|                        | <i>Cytomegalovirus</i> (IgM, IgG)        | Negative          |
|                        | <i>Cytomegalovirus</i> DNA               | Negative          |
|                        | Hepatitis A                              | Immunoprotection* |
|                        | Hepatitis B                              | Immunoprotection* |
|                        | Hepatitis C                              | Negative          |
|                        | HIV antigen/antibodies                   | Negative          |
|                        | <u>Autoimmune disease screening:</u>     |                   |
|                        | Rheumatoid factor                        | Negative          |
|                        | Anti-CCP (IgG)                           | Negative          |
|                        | Anti-myeloperoxidase antibodies          | Negative          |
|                        | Anti-proteinase3 antibodies              | Negative          |
|                        | Anti-actin IgG                           | Negative          |
|                        | Anti-mitochondria antibodies             | Negative          |
|                        | Anti-LKM1 IgG                            | Negative          |
|                        | Anti-ANA IgG                             | Positive*         |
|                        | Anti-Sm IgG                              | Negative          |
|                        | Anti-RNP IgG                             | Negative          |
|                        | Anti-SSA IgG                             | Negative          |
|                        | Anti-SSB IgG                             | Negative          |
|                        | Anti-Jo1 IgG                             | Negative          |
|                        | Anti-Scl-70 IgG                          | Negative          |
|                        | Anti-centromer IgG                       | Positive*         |
|                        | Anti-dsDNA IgG                           | Negative          |
|                        | Anti-chromatin antibodies                | Negative          |
|                        | Anti-ribosomal P IgG                     | Negative          |
|                        | Anti-Sm RNP IgG                          | Negative          |
|                        | <u>Neuroendocrine disease screening:</u> |                   |
|                        | Metanefrine                              | Negative          |
|                        | Normetanefrine                           | Negative          |
|                        | Metoksytyramine                          | Negative          |
| Bronchoalveolar lavage | Cultivation bacteria and fungi           | Negative          |
|                        | Cytology                                 | No atypical cells |
|                        | <u>Respiratory pathogens PCR:</u>        |                   |
|                        | <i>Aspergillus</i> species               | Negative          |
|                        | <i>Mucor</i>                             | Negative          |
|                        | <i>Bordatella pertussis</i>              | Negative          |
|                        | <i>Bordatella parapertussis</i>          | Negative          |
|                        | <i>Mycoplasma pneumoniae</i>             | Negative          |
|                        | <i>Chlamydia pneumoniae</i>              | Negative          |
|                        | <i>Legionella</i> species                | Negative          |

|                         |                                                                                                                                                                                                                                                                                                                  |                                                                                                                                   |
|-------------------------|------------------------------------------------------------------------------------------------------------------------------------------------------------------------------------------------------------------------------------------------------------------------------------------------------------------|-----------------------------------------------------------------------------------------------------------------------------------|
|                         | <i>Pneumocystis jirovecii</i><br>Influenzavirus A and B<br>Parainfluenzavirus 1, 2 and 3<br>Respiratory syncytialvirus<br>Human metapneumovirus<br>Rhinovirus<br>SARS-CoV-2                                                                                                                                      | Negative<br>Negative<br>Negative<br>Negative<br>Negative<br>Negative<br>Positive*                                                 |
| Oropharynx/ nasopharynx | <u>Respiratory pathogens PCR:</u><br><i>Bordatella pertussis</i><br><i>Bordatella parapertussis</i><br><i>Mycoplasma pneumoniae</i><br><i>Chlamydia pneumoniae</i><br>Influenzavirus A and B<br>Parainfluenzavirus 1, 2 and 3<br>Respiratory syncytialvirus<br>Human metapneumovirus<br>Rhinovirus<br>SARS-CoV-2 | Negative<br>Negative<br>Negative<br>Negative<br>Negative<br>Negative<br>Negative<br>Negative<br>Negative<br>Negative<br>Positive* |
| Urine                   | Cultivation<br><i>Pneumococci</i> antigen<br><i>Legionella</i> antigen                                                                                                                                                                                                                                           | Negative<br>Negative<br>Negative                                                                                                  |
| Feces                   | Enteric pathogens PCR                                                                                                                                                                                                                                                                                            | Negative                                                                                                                          |
